# Supplementary material
Source: publisher figshare collection journal article supplement (https://brill.figshare.com/ndownloader/files/34935900)
Supplement: Supplementary file 1 [file 34935900]

**Colour, location and movement: what do models tell us about predation on colour morphs of a poison frog from eastern Amazonia?**

**Appendix**

**
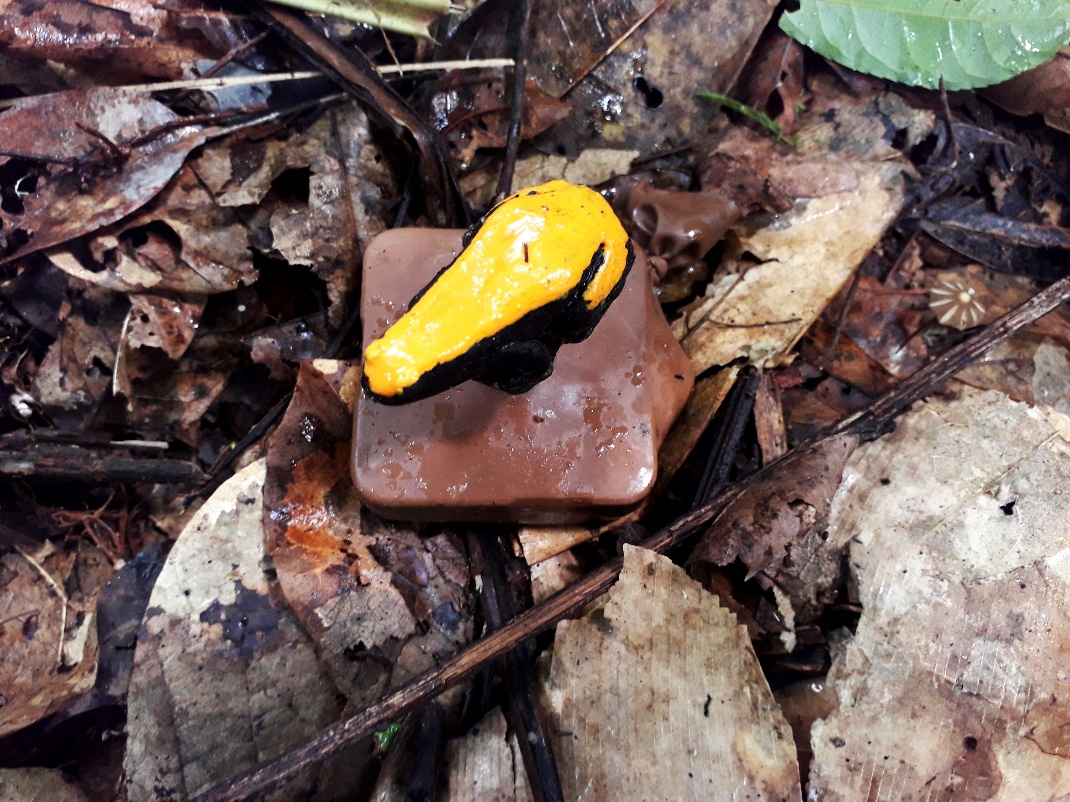
**

**Figure A1.** Photograph of model in in the field.


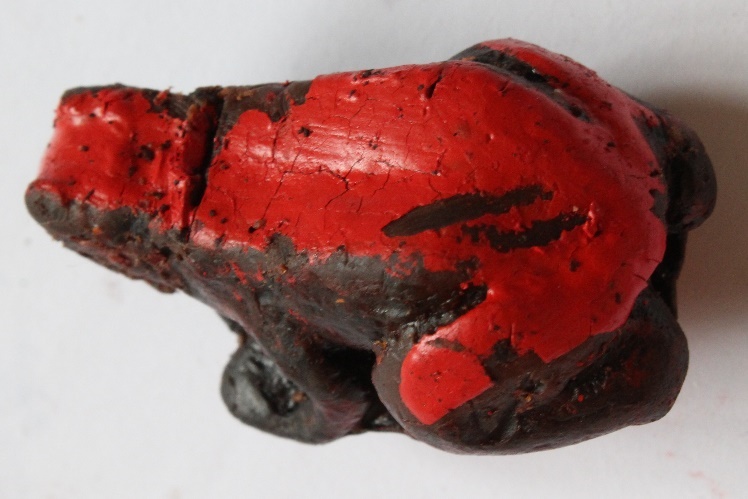


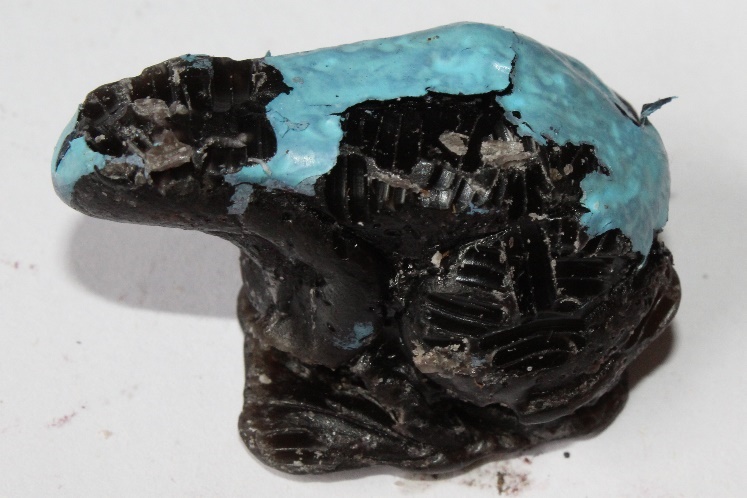


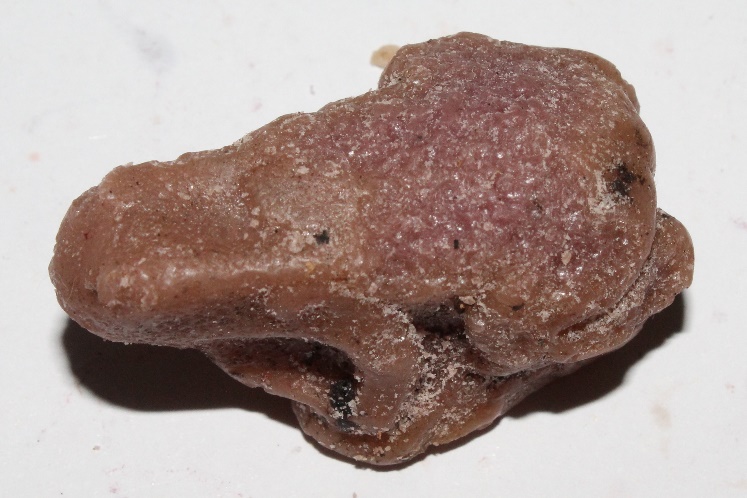


**Figure A2.** Photographs of examples of attack marks. From top to bottom: Bird attack, mammal attack, invertebrate attack.

**Table A1.** Results of GLM and Tukey test between predation of each type of predator for colour category and location

|  | Estimate | SE | *z* value | *p* value |
| --- | --- | --- | --- | --- |
| GLM: Bird attack |  |  |  |  |
| Intercept | -1.9399 | 0.2477 | -7.831 | – |
| Colour |  |  |  |  |
| Non-local–cryptic | 0.1708 | 0.3214 | 0.531 | 0.595 |
| Local–cryptic | 0.2314 | 0.3190 | 0.726 | 0.468 |
| Location (Brasil Novo, Trairão) | -1.3176 | 0.2954 | -4.460 | <0.001 |
| Tukey test: Bird attack |  |  |  |  |
| Non-local –cryptic | 0.17082 | 0.32144 | 0.531 | 0.856 |
| Local –cryptic | 0.23145 | 0.31898 | 0.726 | 0.748 |
| Local –non-local | 0.06062 | 0.30555 | 0.198 | 0.979 |
|  |  |  |  |  |
| GLM: Mammal attack |  |  |  |  |
| Intercept | -4.5782 | 0.7375 | -6.208 | – |
| Colour |  |  |  |  |
| Non-local–cryptic | 1.3867 | 0.7960 | 1.742 | 0.0815 |
| Local–cryptic | 1.1006 | 0.8218 | 1.339 | 0.1805 |
| Location (Brasil Novo, Trairão) | -0.5272 | 0.5228 | -1.009 | 0.3132 |
| Tukey test: Mammal Attack |  |  |  |  |
| Non-local –cryptic | 1.3867 | 0.7960 | 1.742 | 0.185 |
| Local –cryptic | 1.1006 | 0.8218 | 1.339 | 0.367 |
| Local –non-local | -0.2861 | 0.5481 | -0.522 | 0.858 |
|  |  |  |  |  |
| GLM: Invertebrate Attack |  |  |  |  |
| Intercept | -3.1939 | 0.4213 | -7.581 | – |
| Colour |  |  |  |  |
| Non-local–cryptic | 1.3063 | 0.4755 | 2.747 | 0.006 |
| Local–cryptic | 1.5646 | 0.4660 | 3.357 | <0.001 |
| Location (Brasil Novo, Trairão) | -1.4559 | 0.3493 | -4.169 | <0.001 |
| Tukey test: Invertebrate Attack |  |  |  |  |
| Non-local–cryptic | 1.3063 | 0.4755 | 2.747 | 0.016 |
| Local–cryptic | 1.5646 | 0.4660 | 3.357 | 0.002 |
| Local–non-local | 0.2583 | 0.3135 | 0.824 | 0.683 |
